# Supplementary material for: Longitudinal study of risk factors predicting cannabis use disorder in UK young adults and adolescents
Source: Springer Nature journal article supplement (doi:10.1038/s43856-025-01018-y), 2025-07-19
Supplement: MOESM2 [file 43856_2025_1018_MOESM2_ESM.pdf]

## **SUPPLEMENTARY INFORMATION**

**Title:** Longitudinal study of risk factors predicting cannabis use disorder in UK young adults and adolescents

**Authors:** Martine Skumlien<sup>1,2</sup>, Darcy Jones<sup>1</sup>, Claire Mokrysz<sup>3</sup>, Rachel Lees<sup>1</sup>, Kat Petrilli<sup>2</sup>, Shelan Ofori<sup>3</sup>, Will Lawn<sup>4</sup>, H Valerie Curran<sup>3</sup>, Tom P Freeman<sup>1</sup>

**Affiliations:**

<sup>1</sup>Addiction and Mental Health Group (AIM), Department of Psychology, University of Bath, Bath, UK

<sup>2</sup>Department of Addictions, King's College London, London, UK

<sup>3</sup>Clinical Psychopharmacology Unit, University College London, London, UK

<sup>4</sup>Department of Psychology, King's College London, London, UK

**Address correspondence to:** Martine Skumlien, [ms4068@bath.ac.uk](mailto:ms4068@bath.ac.uk)

**Supplementary Table 1.** Results of ordinal logistic regressions predicting CUD Level (no, mild, moderate, severe) by baseline factors in n=117 participants who used cannabis 1-7 days per week at baseline, controlling for age of first cannabis use.

|                           | <i>B</i>        | Standard error | <i>p</i> | Odds ratio | 95% CI, lower | 95% CI, upper |
|---------------------------|-----------------|----------------|----------|------------|---------------|---------------|
| Female                    | -0.21           | 0.36           | .55      | 0.81       | 0.40          | 1.64          |
| Male                      | Reference group |                |          |            |               |               |
| Adolescent                | 1.57            | 0.48           | <.001    | 4.81       | 1.89          | 12.25         |
| Young adult               | Reference group |                |          |            |               |               |
| CUD                       | 2.31            | 0.59           | <.001    | 10.04      | 3.18          | 31.74         |
| No CUD                    | Reference group |                |          |            |               |               |
| After COVID-19 lockdown   | -0.43           | 0.39           | .27      | 0.65       | 0.30          | 1.40          |
| Before COVID-19 lockdown  | Reference group |                |          |            |               |               |
| Days/week cannabis use    | 0.03            | 0.11           | .77      | 1.03       | 0.84          | 1.27          |
| Age of first cannabis use | 0.07            | 0.09           | .42      | 1.07       | 0.90          | 1.28          |
| AUDIT score               | 0.02            | 0.04           | .66      | 1.02       | 0.94          | 1.10          |
| HSI score                 | -0.01           | 0.31           | .99      | 1.00       | 0.54          | 1.82          |
| Negative life events      | 0.04            | 0.11           | .70      | 1.04       | 0.85          | 1.28          |

Abbreviations: AUDIT, Alcohol Use Disorder Identification Test; COVID, coronavirus disease; CUD, cannabis use disorder; HSI, Heaviness of Smoking Index.
